# Supplementary material for: Autism-associated variants of neuroligin 4X impair synaptogenic activity by various molecular mechanisms
Source: PubMed Central journal article supplement (PMC7465329; doi:10.1186/s13229-020-00373-y), 2020-09-01

**Figure 1B**

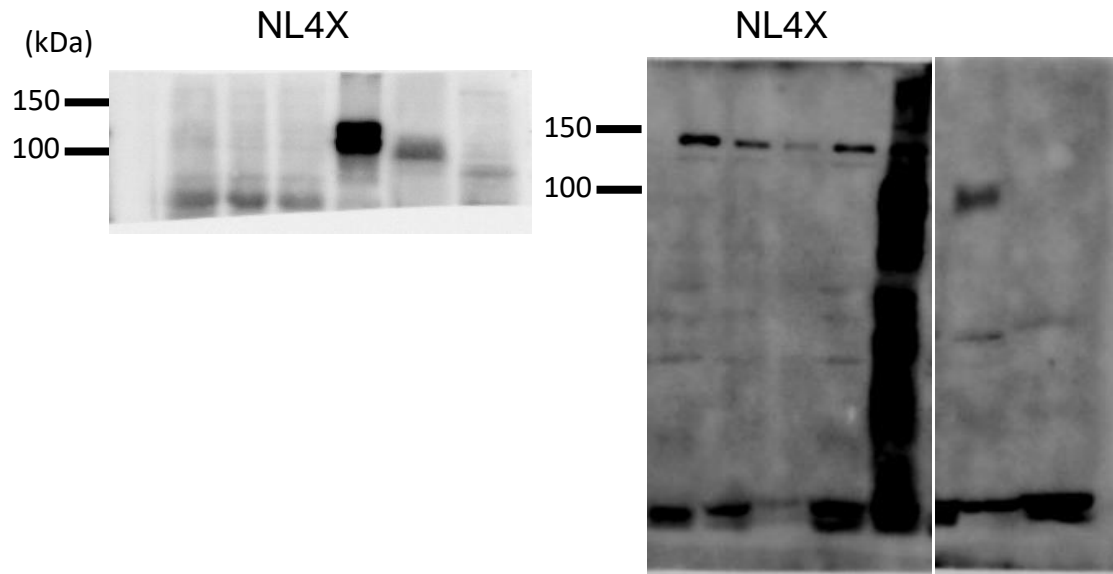

**Figure 1C**

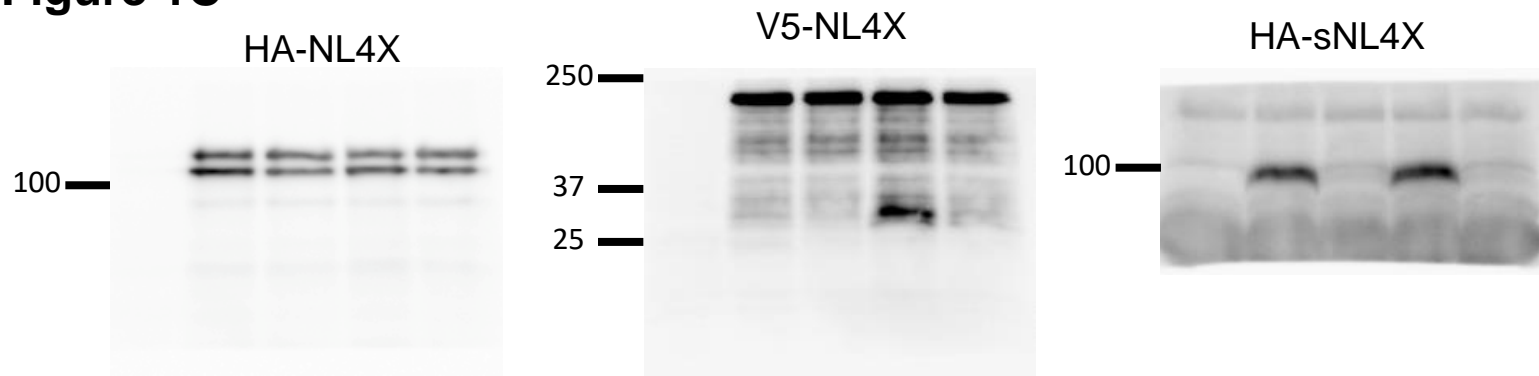

**Figure 1D**

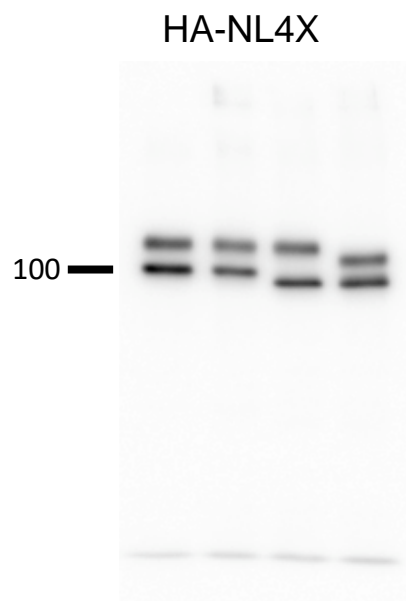

**Figure 1E**

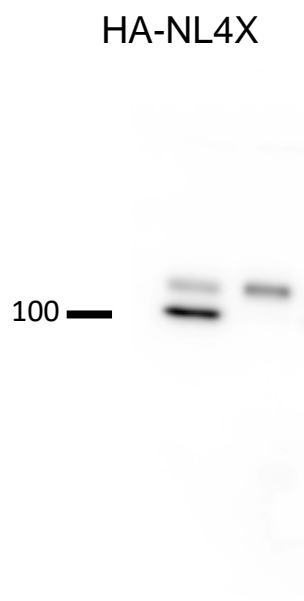

**Figure 1F**

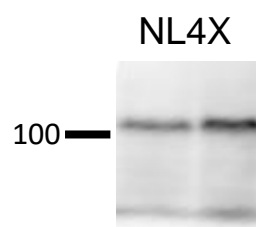

**Figure 1G**

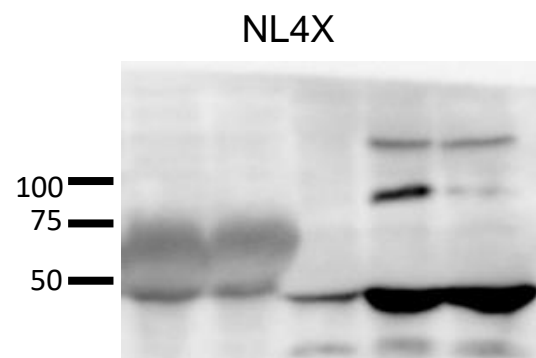

**Figure 1H**

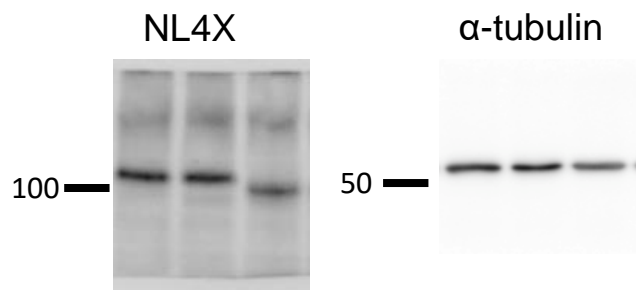

**Figure 1I**

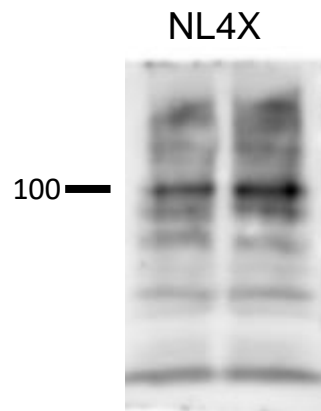

**Figure 1J**

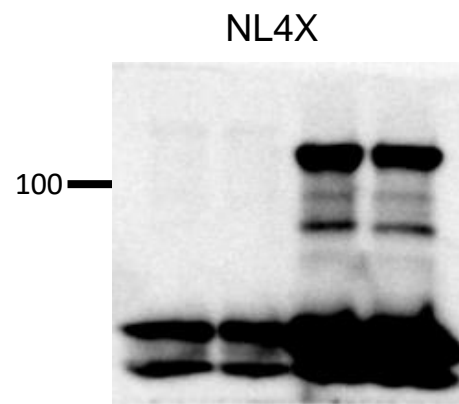

**Figure 1K**

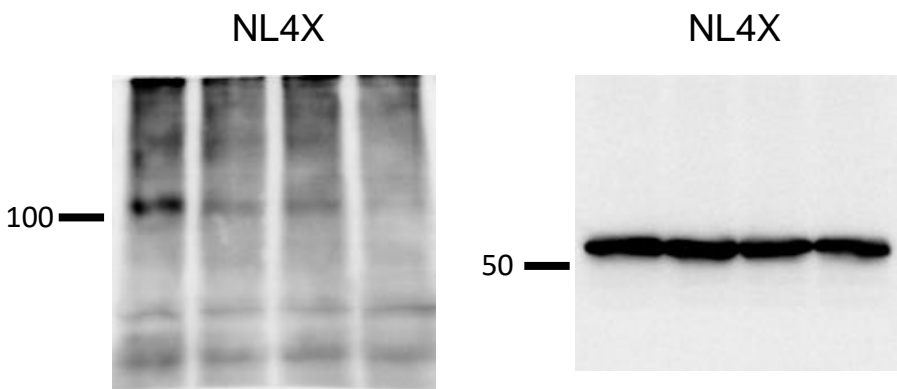

**Figure 2A**

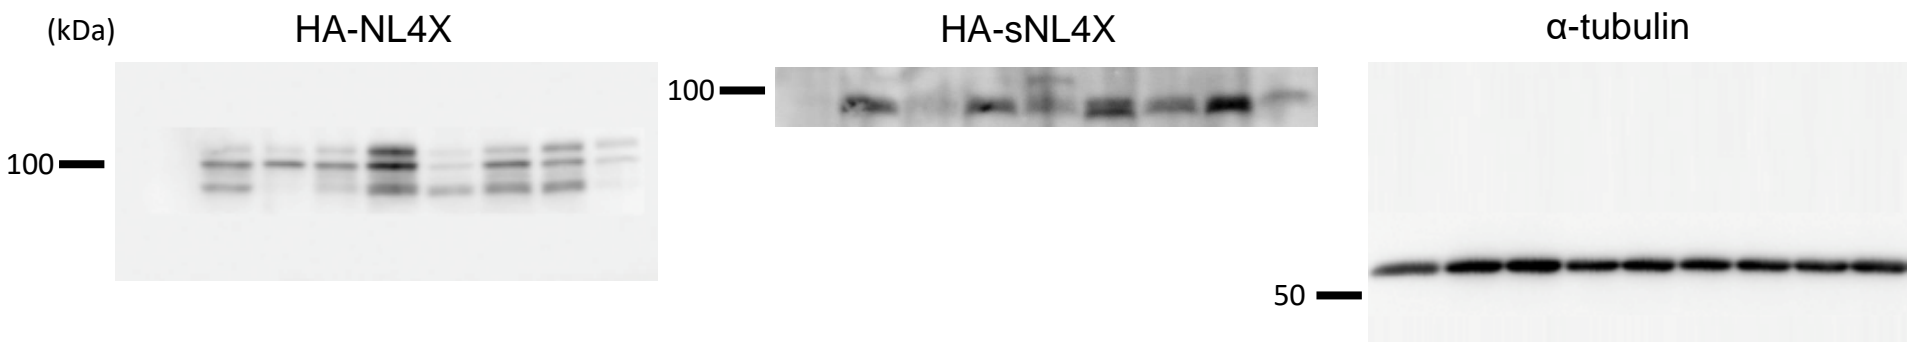

**Figure 2D**

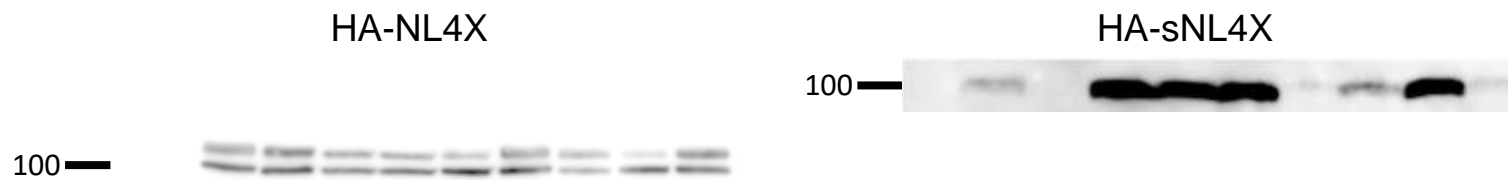

**Figure 4B**

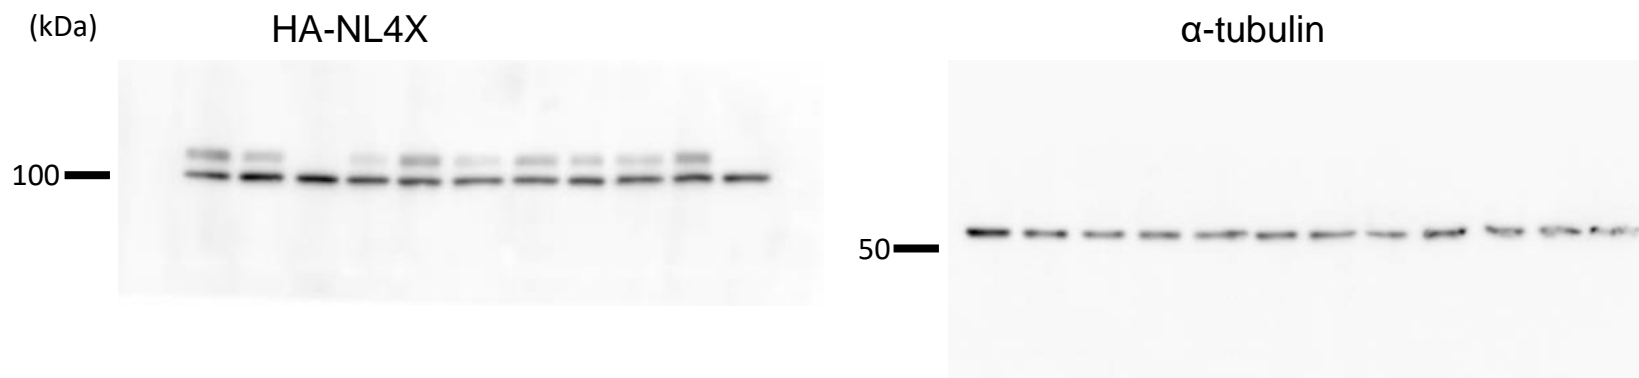

**Figure 4D**

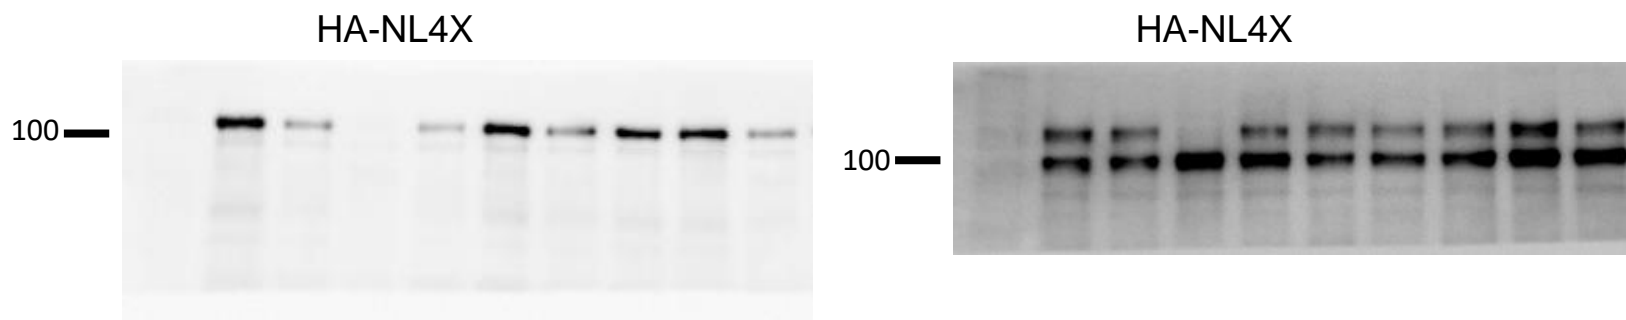

**Figure 4F**

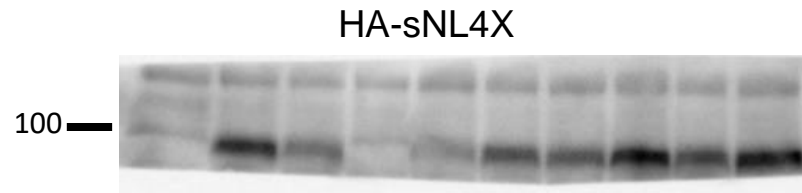

**Figure 5A**

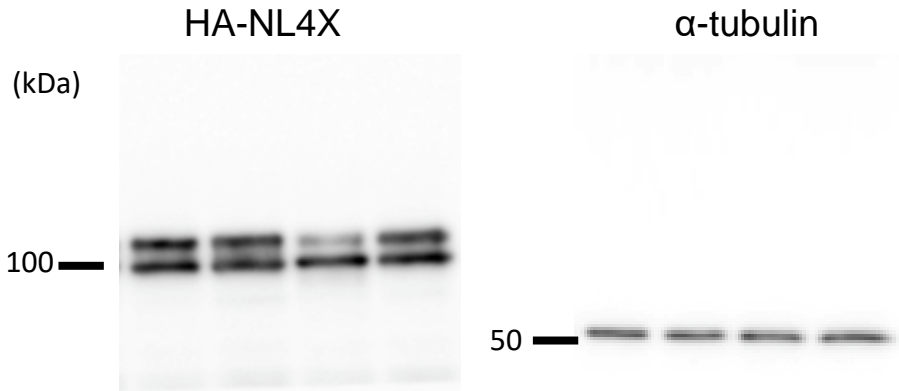

**Figure 5C**

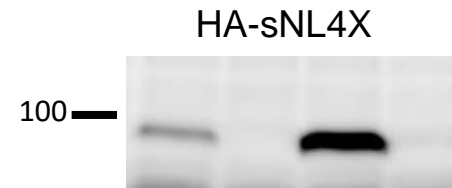

**Figure 5D**

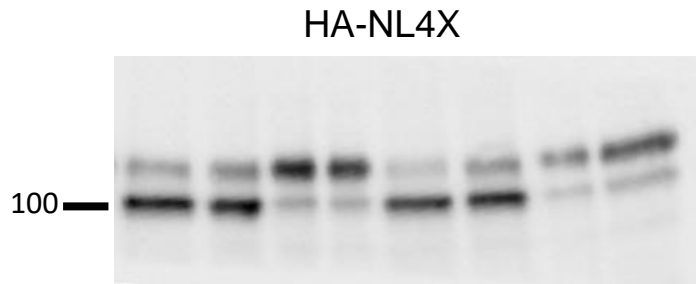

**Figure 6A**

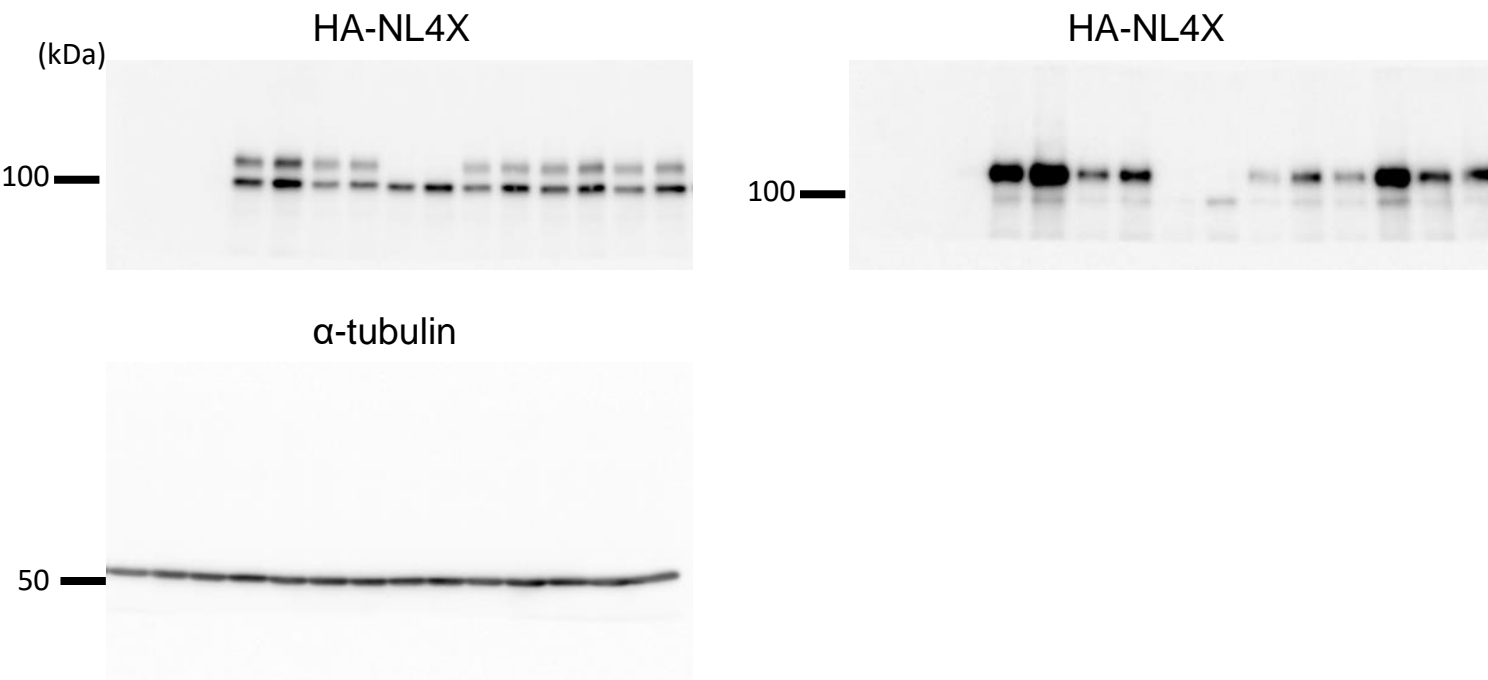

**Figure 6D**

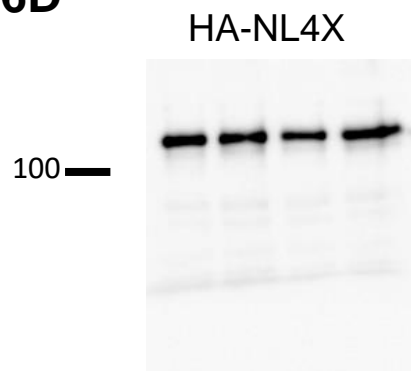

Supplement: 13229_2020_373_MOESM1_ESM.pdf [file 13229_2020_373_MOESM1_ESM.pdf]
